# 1 **Reference interval of optimal vitamin D level for an adult** 2 **population of Bangladesh**

3 Authors: Wasim Md Mohosin Ul Haque<sup>1\*</sup>, Jalaluddin Ashraful Haq<sup>2</sup>, Md. Faruque Pathan<sup>3</sup>,  
4 Mohammed Abu Sayeed<sup>4</sup>

5 <sup>1</sup>Department of Nephrology, Bangladesh Institute of Research and Rehabilitation for Diabetes  
6 Endocrine and Metabolic Disorders, Dhaka, Bangladesh

7 <sup>2</sup>Department of Microbiology, Ibrahim Medical College, Dhaka, Bangladesh

8 <sup>3</sup>Department of Endocrinology, Bangladesh Institute of Research and Rehabilitation for Diabetes  
9 Endocrine and Metabolic Disorders, Dhaka, Bangladesh

10 <sup>4</sup>Department of Community Medicine, Ibrahim Medical College, Dhaka, Bangladesh

11 \*Corresponding author

12 Email: [wmmhaque@live.com](mailto:wmmhaque@live.com)

13

14

15

16

## 17 **Abstract**

18 Vitamin D deficiency presents a significant public health concern, especially in regions where  
19 reference intervals from Western populations may not apply due to differences in sun exposure  
20 and ethnicity. This study aimed to establish population-specific reference intervals for serum 25-  
21 hydroxyvitamin D [25(OH)D] and to determine a deficiency cutoff for healthy adults in  
22 Bangladesh. In a cross-sectional design, we assessed serum 25(OH)D and intact parathyroid  
23 hormone (iPTH) levels in 125 coastal fishermen (Group 1) and 371 urban residents (Group 2),  
24 comprising healthy adults aged 18 years or older. Group 1 served as a reference to establish  
25 baseline vitamin D levels, while Group 2 data aided in determining the deficiency cutoff.  
26 Measurements were conducted using chemiluminescent immunoassay, and reference intervals  
27 were calculated according to Clinical and Laboratory Standards Institute (CLSI) Guidelines C28-  
28 A3. The deficiency cutoff was identified at the deflection point of iPTH levels. Results indicate a  
29 reference interval for serum 25(OH)D of 15.88–45.27 ng/ml among coastal fishermen. Among  
30 urban residents, mean serum 25(OH)D was  $21.53 \pm 15.98$  ng/ml, with iPTH levels showing  
31 significant increases below 12.16 ng/ml (95% CI: 11.04–13.28), establishing this as the  
32 deficiency cutoff. Urban residents exhibited significantly lower vitamin D levels than coastal  
33 fishermen (21.53 ng/ml vs. 27.36 ng/ml,  $p < 0.001$ ). Limitations include potential selection bias  
34 due to convenience sampling and the use of chemiluminescent immunoassay instead of the gold-  
35 standard LC-MS/MS assay. This study provides the first population-specific reference intervals  
36 for serum 25(OH)D in Bangladesh, accounting for unique sun exposure patterns and ethnic

37 factors, and sets a deficiency threshold at 12.16 ng/ml. These findings are critical for guiding  
38 targeted interventions against vitamin D deficiency in this region.

39 **Keywords:** Vitamin D, parathyroid hormone, reference interval, cut-off value, deflection point,  
40 coastal fishermen, urban population, Bangladesh

## 41 **Introduction**

42 Vitamin D, a crucial fat-soluble vitamin, plays a vital role in various physiological functions,  
43 including calcium and phosphorus homeostasis, immune function, and cell growth modulation(1-  
44 4). Consequently, its deficiency can lead to a range of diseases and disabilities (3, 5, 6). Despite  
45 Bangladesh's favourable geographical location, the prevalence of vitamin D deficiency remains  
46 high even among seemingly healthy individuals (7, 8).

47 Current reference intervals for vitamin D are predominantly derived from studies conducted in  
48 Western populations and may not accurately reflect the physiological needs or health outcomes  
49 of diverse global populations(9, 10). Variations in genetics, skin pigmentation, dietary habits,  
50 and sun exposure significantly impact vitamin D levels, rendering universal reference intervals  
51 potentially inappropriate for many non-Western populations. Genetic polymorphisms affecting  
52 vitamin D metabolism and receptor activity vary among ethnic groups, leading to different  
53 optimal levels of serum 25-hydroxyvitamin D [25(OH)D] required for health (11, 12).  
54 Consequently, a one-size-fits-all approach can result in incorrect diagnoses, unnecessary  
55 supplementation, potential toxicity, or under-treatment and persistence of deficiency-related  
56 health issues.

57 Therefore, establishing a vitamin D reference interval specific to Bangladesh is crucial for  
58 accurate diagnosis and effective management of vitamin D deficiency. This study aims to  
59 establish the reference interval of serum 25-hydroxyvitamin D [25(OH)D] levels for the adult  
60 population of Bangladesh by examining two distinct groups: adequately sun-exposed healthy  
61 coastal fishermen and urban individuals with limited sun exposure.

62 Also, the study determined the lower cut-off value of vitamin D deficiency level in Bangladeshi  
63 adults by detecting the deflection point of serum intact parathyroid hormone (iPTH) level  
64 compared to serum 25(OH)D level. Vitamin D deficiency physiologically induces increased  
65 synthesis/production of parathyroid hormone.

66

## 67 **Methodology**

68 The study was conducted from January 1, 2017, to December 31, 2021. The study protocol was  
69 approved by the institutional ethics review board. Informed consent was obtained from all  
70 participants, and data confidentiality was strictly maintained.

### 71 **Study site and population:**

72 The study was conducted in two geographical locations: Cox's Bazar, a coastal district, about  
73 298 km south of Dhaka city along the coast of Bay of Bengal with abundant sunlight; and Dhaka,  
74 the capital city, characterized by limited sun exposure of its inhabitants due to urbanization. The  
75 study was conducted from January 1, 2017, to December 31, 2021.

76

77

## 78 **Study design:**

79 Cross-sectional study design was employed to assess vitamin D levels in two population groups:  
80 adequately sun-exposed healthy coastal fishermen (Group-1) and urban residents with limited  
81 sun exposure (Group-2). Group-1 consisted of healthy adult coastal fishermen aged 18 years and  
82 above from Cox's Bazar, who are regularly and adequately exposed to sunlight and consume  
83 marine fish, a rich source of vitamin D. Adequate sun exposure was defined as exposure to direct  
84 sunlight at least for 30 minutes, between 11 am and 2 pm, three times a week (13). Group-1  
85 individuals (coastal fishermen) were considered as reference population for determining the  
86 vitamin D reference interval of local population. Group-2 comprised of ostensibly healthy urban  
87 residents from Dhaka, aged 18 years and above, with limited sun exposure due to lifestyle and  
88 environmental factors.

## 89 **Exclusion Criteria:**

90 Any individual who refused to participate in the study or who were physically and  
91 psychologically handicapped, had known acute or chronic illnesses like diabetes mellitus,  
92 hypertension, liver disease or gastrointestinal disorders, kidney disease, malignancy, metabolic  
93 bone disease, primary hyperparathyroidism or lactose intolerance were excluded. Anyone with  
94 relevant biochemical abnormalities and on anti-epileptic drugs was also excluded.

95 For Group-1, anyone who was consuming either vitamin D or calcium-containing products or  
96 who had ever consumed such drugs in the past was excluded.

97

### 98 **Sampling technique and sample size:**

99 Convenience sampling was used to select participants from both groups. The sample size was  
100 determined based on the desired confidence limits and the variability in vitamin D levels  
101 observed in preliminary studies. Adequate sample sizes were ensured to provide statistically  
102 significant results.

### 103 **Data collection tools and procedures:**

104 Sociodemographic and clinical data were collected using structured questionnaires. Height,  
105 weight, and blood pressure were measured, and blood samples were collected for estimation of  
106 serum 25(OH)D, iPTH levels and relevant biochemical parameters. The biochemical analyses  
107 were conducted using standardized procedures to ensure accuracy and reliability.

### 108 **Collection of blood and biochemical investigations:**

109 About 10 ml of venous blood was collected aseptically from each participant after counselling  
110 and thorough clinical evaluation. Serum was separated immediately and was preserved at -60°C  
111 for biochemical analysis. Chemiluminescent micro-particle immunoassay (CMIA) was used to  
112 estimate serum 25(OH)D level (14) by Architect analyser. Based on the Endocrine Society  
113 guideline (9), vitamin D level was categorised as: adequate/normal range: 75-100 nmol/L (30-

114 40ng/ml), insufficient: 50 – 74.9 nmol/L (20ng/ml-29.99ng/ml) and deficient: <50 nmol/L  
115 (<20ng/ml). Samples were tested for random blood glucose (RBG), serum creatinine, calcium,  
116 PO4, albumin, alkaline phosphatase and iPTH by Architect autoanalyser at the biochemistry  
117 laboratory of BIRDEM.

## 118 **Statistical Analyses:**

119 Statistical analyses were conducted using descriptive and inferential methods to summarize the  
120 data and assess factors influencing vitamin D levels. Chi-square tests, correlation analyses, and  
121 regression models were employed to explore these relationships. MedCalc version 14 statistical  
122 software was utilized to calculate reference intervals (95%, double-sided) following parametric,  
123 non-parametric, and robust methods as outlined in the CLSI C28-A3 guideline(15). A 90%  
124 confidence interval (CI) was used for these reference intervals, applying the appropriate  
125 statistical techniques.

126 To determine the lower cutoff value of vitamin D deficiency, the deflection point of serum iPTH  
127 levels was identified using a non-linear model. Piecewise linear regression, applied through the  
128 Python plugin, was used to fit two separate lines before and after the deflection point (or “break”  
129 point), where the relationship between vitamin D and PTH shifts.

130 The equation used in this case represented as follows:

$$131 \quad y = \begin{cases} k_1 \cdot x + y_0 & \text{or } x < x_0 \\ k_2 \cdot x + y_0 - k_2 \cdot x_0 & \text{or } x \geq x_0 \end{cases}$$

132 In this model:

- 133 • x represents Vitamin D level (independent variable).
- 134 • y represents PTH level (dependent variable).

- 135 •  $x_0$  is the deflection point where the two lines meet.
- 136 •  $y_0$  is the PTH level at the deflection point.
- 137 •  $k_1$  is the slope of the line before the deflection point (for  $x < x_0$ ).
- 138 •  $K_2$  is the slope of the line after the deflection point (for  $x \geq x_0$ ).

139 The steps for calculating the deflection point include:

- 140 1. **Initial estimation:** A starting guess for  $x_0$  is made based on visual inspection or prior  
141 knowledge.
- 142 2. **Curve fitting:** The SciPy curve fit function optimizes  $x_0$ ,  $y_0$ ,  $k_1$  and  $k_2$  by minimizing the  
143 difference between the model and observed data.
- 144 3. **Confidence intervals:** Standard errors are used to calculate 95% confidence intervals for  
145 the estimates.

146 This approach effectively identifies the point where the relationship between vitamin D and PTH  
147 levels changes.

## 148 **Ethical Consideration**

149 The Ethics Review Committee (ERC) of the Centre for Higher Studies and Research,  
150 Bangladesh University of Professionals and Diabetic Association of Bangladesh has approved  
151 the protocol. Written informed consent was obtained from all participants prior to study  
152 enrolment and blood sample collection. The aims and objectives of the study, as well as its  
153 procedure, were explained to each participant. Participants were assured that all information and



154 records would be kept confidential and only used for research purposes. Participants had the  
155 right to withdraw from the study at any time.

156

157

## 158 **Result**

159 Total 125 and 371 individuals were enrolled in Group 1 and Group 2 respectively. Group-1 study  
160 population had a mean age of  $37.98 \pm 11.61$  years, (95% CI :35.93, 40.04), and a mean BMI of  
161  $22.22 \pm 3.15$  kg/m<sup>2</sup>, (95% CI:21.66, 22.77). Detail anthropometric and biochemical parameters of  
162 Group-1 study population is shown in Table 1.

163 Table 1: Anthropometric and biochemical parameters of Group-1(coastal fishermen) study population (n=125)

| Parameters           | n(%)     | Mean±SD      | 95% CI of Mean |
|----------------------|----------|--------------|----------------|
| Age(years)           |          |              |                |
| 18-30                | 40(32.0) | 25.48±3.68   | 24.3, 26.65    |
| 31-40                | 40(32.0) | 35.90±2.97   | 34.95, 36.85   |
| 41-50                | 28(22.4) | 46.68±3.32   | 45.39, 47.97   |
| >50                  | 17(13.6) | 58.00±3.35   | 56.28, 59.72   |
| Total                | 125      | 37.98±11.61  | 35.93, 40.04   |
| Height(cm)           | 125      | 161.10±7.57  | 159.76, 162.44 |
| Weight(kg)           | 125      | 57.52±8.37   | 56.04, 59.00   |
| BMI                  |          |              |                |
| <18.5                | 10(8.0)  | 16.69±1.69   | 15.48, 17.90   |
| 18.5-24.9            | 91(72.8) | 21.57±1.74   | 21.21, 21.93   |
| 25-29.9              | 24(19.2) | 26.97±1.46   | 26.35, 27.58   |
| RBS (mmol/l)         |          | 6.01±0.87    | 5.85, 6.16     |
| S creatinine (mg/dl) |          | .8992±0.11   | 0.88, 0.92     |
| S albumin (g/L)      |          | 45.4024±2.92 | 44.89, 45.92   |
| S calcium (mg/dl)    |          | 9.3720±0.44  | 9.29, 9.45     |
| S PO4 (mg/dl)        |          | 3.2888±0.54  | 3.19, 3.38     |
| S Alk Phos (U/L)     |          | 79.86±16.38  | 76.96, 82.76   |
| S iPTH (pg/ml)       |          | 20.6264±8.85 | 19.06, 22.19   |

164 Note: RBS= random blood sugar, Alk Phos= alkaline phosphatase (Normal:44 to 147 IU/L),  
165 iPTH= intact parathyroid hormone. (Normal:10-65 pg/ml)

166

167 Group-2 included a total of 371 urban healthy adults. Among the 371 participants, 47.2% were  
 168 male and 52.8% were female, with a mean age of  $44.19 \pm 11.48$  years. BMI of the majority of  
 169 the participants were between 18.5 to 29.9 kg/m<sup>2</sup>). Detail socio-demographic and anthropometric  
 170 characteristics of Group-2 study population is shown in Table 2.

171

172 Table 2. Socio-demographic and anthropometric characteristics of Group-2 study population (n=371)

| Variables                 | Total N (%) | Mean±SD       | 95% CI of Mean |
|---------------------------|-------------|---------------|----------------|
| Category                  |             |               |                |
| Gender                    |             |               |                |
| Male                      | 175 (47.2)  | -             |                |
| Female                    | 196 (52.8)  | -             |                |
| Age group* (years)        |             |               |                |
| 19 to 44                  | 173 (46.6)  | 34.34±6.68    | 33.34, 35.34   |
| 45 to 64                  | 182 (49.1)  | 51.65±4.69    | 50.97, 52.34   |
| 65 to 79                  | 14 (3.8)    | 68.21±2.75    | 66.63, 69.80   |
| > 80                      | 1 (0.3)     | 80.00±        | -              |
| Total                     | 371         | 44.19 ± 11.48 | ??             |
| Height (cm)               | 371(100)    | 161.65±7.86   | 160.85, 162.45 |
| Weight (kg)               | 371(100)    | 68.61±10.86   | 67.51, 69.72   |
| BMI**(kg/m <sup>2</sup> ) |             |               |                |
| <18.5                     | 4(1.1)      | 17.55±0.85    | 16.20, 18.91   |
| 18.5-24.9                 | 146(39.4)   | 23.08±1.45    | 22.84, 23.32   |
| 25-29.9                   | 164(44.2)   | 27.18±1.36    | 26.98, 27.39   |
| >30                       | 57(15.4)    | 32.49±2.60    | 31.80, 33.18   |

173 \*MeSH classification, \*\*WHO classification. CI = confidence interval

174

175 The mean serum vitamin D level of Group 1 study population was  $27.36 \pm 7.27$  ng/ml, (95% CI  
 176 :26.08, 28.65). No significant difference was found in vitamin D levels amongst age groups.  
 177 However, there was a significant difference among BMI groups ( $F = 3.377$ ,  $p = .037$ ). Post-hoc  
 178 testing using Bonferroni correction revealed that individuals with the highest BMI (25-29.9  
 179 kg/m<sup>2</sup>) had significantly ( $p = .037$ ) lower serum 25(OH)D levels compared to those with the  
 180 lowest BMI (<18.5 kg/m<sup>2</sup>), with a mean difference of -6.82 ng/ml. No significant differences  
 181 were observed between other BMI groups (Table 3).

182

183 Table 3. Age and BMI-specific serum Vitamin D levels of Group-1 study population (n=125)

|             | n (%) | 25(OH)D<br>Mean ± SD (ng/ml) | 95% CI of mean | ANOVA               |
|-------------|-------|------------------------------|----------------|---------------------|
| Age(years)  |       |                              |                |                     |
| 18-30       | 40    | 28.30 ± 7.77                 | 25.82, 30.78   | F = 0.506, p = .679 |
| 31-40       | 40    | 27.21 ± 7.48                 | 24.82, 29.60   |                     |
| 41-50       | 28    | 26.10 ± 6.37                 | 23.63, 28.57   |                     |
| >50         | 17    | 27.59 ± 7.30                 | 23.84, 31.34   |                     |
| BMI (kg/m2) |       |                              |                |                     |
| <18.5       | 10    | 32.76 ± 8.71                 | 26.53, 39.00   | F = 3.37, p = .037  |
| 18.5-24.9   | 91    | 27.14 ± 7.14                 | 25.66, 28.63   |                     |
| 25-29.9     | 24    | 25.95 ± 6.43                 | 23.23, 28.66   |                     |
| All         | 125   | 27.36 ± 7.27                 | 26.08, 28.65   |                     |

184 CI = confidence interval,

185

186 There was no correlation between serum vitamin D level and age ( $r = -.05511$ ;  $p = .5416$ ; 95%  
 187 CI: -0.2285, 0.1217). A significant negative linear correlation was found between vitamin D and  
 188 BMI in the Pearson correlation coefficient test ( $r = -.2677$ ;  $p = .0025$ ; 95% CI: -0.4234, -  
 189 0.09662) (Figure 1). There was no significant correlation between serum 25(OH) D and serum  
 190 iPTH ( $r = -.1635$ ;  $p = .0685$ ; 95%CI: -0.3296, 0.01249), and other relevant biochemical  
 191 parameters (Table 4). Based on the Endocrine Society cut-off value (9), 86 (68.8%) participants  
 192 had < 30ng/ml vitamin D Levels (Table 5). There was no significant difference in serum iPTH  
 193 level and other relevant biochemical parameters amongst different vitamin D status groups (Table  
 194 6).

195

196 Figure 1: Correlation between serum 25(OH)D and BMI

197

198

199 Table 4. Correlation between serum 25(OH)D and relevant  
 200 biochemical parameters

| Parameters         | r       | p-value | 95% CI for r    |
|--------------------|---------|---------|-----------------|
| S. Calcium (mg/dl) | -.06803 | .4510   | -0.2408, 0.1089 |
| S. PO4 (mg/dl)     | .06004  | .5060   | -0.1168, 0.2332 |

|                   |        |       |                  |
|-------------------|--------|-------|------------------|
| S. Alk Phos (U/L) | -.1612 | .0725 | -0.3275, 0.01484 |
| S. iPTH (pg/ml)   | -.1635 | .0685 | -0.3296, 0.01249 |

201 CI = confidence interval,

202

203 Table 5: Serum Vitamin D status of the Group-1 (coastal fishermen) study population based on

204 the Endocrine Society cut-off value (9)

| Status                           | n (%)     | Serum 25(OH)D<br>Mean±SD (ng/ml) |
|----------------------------------|-----------|----------------------------------|
| Deficient (<20ng/ml)             | 23 (18.4) | 17.96±1.69                       |
| Insufficient (21ng/ml-29.9ng/ml) | 63 (50.4) | 25.52±2.53                       |
| Adequate(≥30ng/ml)               | 39 (31.2) | 35.90±5.16                       |
| All cases                        | 125       | 27.36±7.27                       |

211

212

213 Table 6. Levels of different serum biochemical markers related to vitamin D status of Groups-1 study population  
214 (n=125)

| Parameters        | Serum 25-hydroxy vitamin D |              |             | ANOVA    |          |
|-------------------|----------------------------|--------------|-------------|----------|----------|
|                   | Deficient                  | Insufficient | Adequate    |          |          |
| S Calcium (mg/dl) | 9.42±0.37                  | 9.37±0.42    | 9.34±0.51   | F = .202 | p = .818 |
| S PO4 (mg/dl)     | 3.25±0.67                  | 3.26±0.52    | 3.36±0.48   | F = .483 | p = .618 |
| S Alk Phos (U/L)  | 80.61±20.14                | 80.89±12.17  | 77.77±19.24 | F = .462 | p = .631 |
| S iPTH (pg/ml)    | 21.63±7.49                 | 20.81±9.46   | 19.73±8.68  | F = .361 | p = .698 |

215

216 Reference interval of vitamin D of coastal fishermen (Reference population) Based on CLSI

217 Guidelines C28-A3, 90% CI was used to calculate the reference interval of the Group-1

218 reference population (coastal fishermen). The calculated reference interval of serum vitamin D

219 value by parametric, non-parametric and robust methods were 15.78-44.29, 15.88-45.27 and

220 15.69-44.68 ng/ml, respectively (Figure 2, Table 7). Later in the study, the vitamin D status of the

221 urban population was determined based on the fishermen's reference interval.

222

223 Figure 2: Reference interval of vitamin D. (95% Reference interval, Double-sided)

224

225 Table 7. Reference interval of vitamin D levels calculated by different methods using serum 25(OH)D level of  
226 Group-1 study population

| Methods                         | Serum 25(OH)D (ng/ ml)   |
|---------------------------------|--------------------------|
| A. Based on Normal distribution |                          |
| Lower limit (90% CI)            | 15.78 (14.7581, 16.8828) |

|                                                   |                            |
|---------------------------------------------------|----------------------------|
| Upper limit (90% CI)                              | 44.29 (41.4114, 47.3733)   |
| B. Non-parametric percentile method (CLSI C28-A3) |                            |
| Lower limit (90% CI)                              | 15.87 (14.2600, 16.9200)   |
| Upper limit (90% CI)                              | 45.2670 (41.1100, 51.8500) |
| C. Robust method (CLSI C28-A3)                    |                            |
| Lower limit (90% CI <sup>a</sup> )                | 15.6855 (14.6794, 16.8548) |
| Upper limit (90% CI <sup>a</sup> )                | 44.6759 (41.8912, 47.5948) |

227 90% CI = 90% confidence interval.

228 <sup>a</sup>Bootstrap confidence interval (10000 iterations; random number seed: 978).

229

230 The mean vitamin D level in the urban population was 21.53±15.98 ng/ml (95% CI:19.9, 23.16),  
 231 with a median of 17.18 ng/ml and a range of 3.48 to 147.32 ng/ml. There was no significant  
 232 difference in vitamin D levels between male (20.16±16.18 ng/ml) and female (22.76±15.74  
 233 ng/ml) participants using parametric methods ( $p > .05$ , 95% CI: -5.86, 0.66). However,  
 234 nonparametric methods indicated significantly higher levels in females ( $p=.008$ ). Table 8 shows  
 235 that mean serum vitamin D levels were significantly higher in older age groups ( $p = .001$ ) and  
 236 positively correlated with age in urban populations ( $r = .174$ ,  $p = .001$ , 95% CI:0.073,  
 237 0.271;Figure-3). There were no significant differences in vitamin D levels between BMI groups  
 238 ( $F = 0.173$ ,  $p > .05$ ).

239

240 Table 8. Age (MeSH classification) and BMI (WHO classification) specific serum Vitamin D levels of Group-2  
 241 study population (n=371)

| Variable                 | n (%)     | Mean±SD<br>(ng/ml) | 95% CI for<br>Mean | t-test/ANOVA            |
|--------------------------|-----------|--------------------|--------------------|-------------------------|
| Gender                   |           |                    |                    |                         |
| Male                     | 175       | 20.16±16.18        |                    | $p = .118^{**}$         |
| Female                   | 196       | 22.76±15.74        | -5.86, 0.66        |                         |
| Age groups (years)*      |           |                    |                    |                         |
| 19 to 44                 | 173(46.6) | 18.35±15.67        | 15.99, 20.70       | $F=5.990$ , $p=.001$    |
| 45 to 64                 | 182(49.1) | 23.46±15.32        | 21.21, 25.70       |                         |
| 65 to 79                 | 14(3.8)   | 30.15±15.00        | 21.49, 38.81       |                         |
| 80 years and over        | 1(.3)     | 50.49.             |                    |                         |
| BMI (kg/m <sup>2</sup> ) |           |                    |                    |                         |
| <18.5                    | 4(1.1)    | 19.29±10.57        | 2.47, 36.12        | $F = .173$ , $p = .915$ |
| 18.5-24.9                | 146(39.4) | 20.88±15.67        | 18.32, 23.44       |                         |

|                             |           |             |              |
|-----------------------------|-----------|-------------|--------------|
| 25-29.9                     | 164(44.2) | 21.94±17.67 | 19.21, 24.66 |
| >30                         | 57(15.4)  | 22.18±11.60 | 19.10, 25.26 |
| Total Gr-2 study population | 371(100)  | 21.53±15.98 | 19.90, 23.16 |

242 \*One subject aged 18 years excluded; \*\*Parametric (independent-samples t-test); \*Both parametric (independent-  
 243 samples t-test) and non-parametric (independent-samples Mann-Whitney U test) methods.

244 \*\*Parametric (independent-samples t-test)

245

246 Figure-3: Correlation between age and vitamin D

247

248 According to the Endocrine Society cut-off value (9), 83.6% of the urban population had below-  
 249 normal (inadequate) vitamin D levels. However, using the fishermen's reference intervals  
 250 established in the first phase of this study, only 44.2% of the urban population were found to  
 251 have below-normal vitamin D levels (Table 9). Approximately 47% of individuals classified as  
 252 having inadequate vitamin D levels by the Endocrine Society's criteria were actually within the  
 253 adequate range based on the fishermen's reference interval (**Error! Reference source not**  
 254 **found.**). The mean serum vitamin D level was significantly lower in the urban group  
 255 (21.53±15.98 ng/ml) compared to fishermen (27.36±7.27 ng/ml); 95% CI [-7.91, -3.76],  $p <$   
 256 .001.

257 Table 9. Vitamin D status of the urban people based on the Endocrine society cut-off value and fishermen's  
 258 reference interval

| Vitamin D status of the Gr-2 people | Below normal<br>n (%)                                        | Normal<br>n (%) | Above normal<br>n (%) |
|-------------------------------------|--------------------------------------------------------------|-----------------|-----------------------|
| Based on ES cut-off value           | 310 (83.6)<br>Deficiency 221(59.6)<br>Insufficiency 89(24.0) | 27(7.3)         | 34(9.2)               |
| Based on fishermen's cut-off value  | 164(44.2)                                                    | 184(49.6)       | 23(6.2)               |

259 ES = Endocrine society, FM = coastal fishermen (Gr-1)

260

261 The mean serum iPTH level in the urban population was 62.80 ±31.67 pg/ml, with a median of  
 262 56.40 pg/ml, ranging from 10.20 to 227.54 pg/ml. There was a significant negative correlation  
 263 between serum vitamin D and serum iPTH ( $r = -0.233$ , 95% CI: -0.3273, -0.1347;  $p < .001$ )

264 (Figure ). However, the significant differences in PTH values among different vitamin D  
265 segments indicate a nonlinear relationship between vitamin D and PTH (Table 10).

266

267 Figure -4: Correlation between serum vitamin D and serum iPTH in urban population

268

269 Table 10. Mean PTH level in different vitamin D segments based on  
270 Endocrine society cut-off value

| Vit D status                 | ng/mL     | n   | iPTH(pg/ml)<br>Mean* | 95% CI of<br>mean |
|------------------------------|-----------|-----|----------------------|-------------------|
| Vitamin D deficiency         | <20       | 221 | 66.94                | 62.68, 71.21      |
| Vitamin D insufficiency      | 20 - 29.9 | 89  | 60.47                | 53.68, 67.26      |
| Vitamin D normal range       | 30-40     | 27  | 59.89                | 49.89, 69.90      |
| Vitamin D above normal range | >40       | 34  | 44.33                | 35.90, 52.76      |

271 \* Difference of means is significant at <1% level of significance (F=5.55, p=.001)

272

273 The LOWESS (locally weighted scatter plot smoothing) method was employed to illustrate the  
274 relationship between serum iPTH and serum 25(OH)D. It was found that as vitamin D level  
275 decreased, PTH level decreased until reaching a plateau (Figure-5). This plateau, known as the  
276 PTH deflection point, indicates the lower cut-off for optimal serum vitamin D levels. Using  
277 piecewise linear regression with the Python plugin in SPSS, the visually estimated deflection  
278 point of 12.5 ng/ml was refined to 12.16 ng/ml, with a 95% confidence interval ranging from  
279 11.04 ng/ml to 13.28 ng/ml.

280

281 Figure-5: The scatterplot with LOESS fitting (50%) illustrates the relationship between vitamin D and PTH, with  
282 vitamin D (ng/ml) on the x-axis and serum iPTH (pg/ml) on the y-axis. The vertical line indicates the PTH  
283 deflection point using the raw data.

284

## 285 **Discussion**

### 286 **Health**

287 The study focused on the health of Group-1 (coastal fishermen), ensuring all participants were  
288 clinically and biochemically healthy. This prerequisite allowed for an accurate determination of  
289 the reference interval for vitamin D. The coastal environment, with its pollution-free air,  
290 excellent sun exposure, and consumption of marine fish, ensured vitamin D adequacy for this  
291 group. Prior studies, such as the 1958 birth cohort study in Scotland, have also linked coastal  
292 climates with higher levels of 25(OH)D due to increased sun exposure (16). The inclusion of  
293 only male participants in Group 1 to ensure adequate sun exposure might be seen as a limitation.  
294 However, other studies indicate no significant gender-specific differences in vitamin D levels (8,  
295 17).

296 Overweight subjects were excluded from Group 1, yet a significant negative correlation between  
297 vitamin D and BMI was observed, consistent with previous findings (18-21). Studies consistently  
298 show an inverse relationship between BMI and vitamin D levels, highlighting the impact of body  
299 weight on vitamin D status (22-24). The lack of correlation between age and serum vitamin D  
300 levels in Group 1 suggests the overall good health of the study population. This may obscure the  
301 typical association between lower vitamin D levels and older age, often attributed to reduced  
302 outdoor activity and impaired kidney function in older adults (25).



303 Health status of the Group-2 participants was not as strictly controlled, with only those with  
304 acute illnesses being excluded. This approach aligns with other studies examining the correlation  
305 between PTH and vitamin D, which often include people with a broader range of health statuses  
306 (26-32).

## 307 **Vitamin D Status**

308 In the present study, irrespective of the adequacy of sun exposure, most participants in both the  
309 fishermen and urban groups had low vitamin D levels, with means of  $27.36 \pm 7.27$  ng/ml and  
310  $21.53 \pm 15.98$  ng/ml, respectively. This high prevalence of vitamin D inadequacy aligns with  
311 recent studies reporting widespread vitamin D insufficiency or deficiency in Bangladesh (8, 33-  
312 39). For instance, Mahmood et al. (2017) found that 100% of garment workers and 97% of  
313 agricultural and construction workers had low vitamin D levels. Garment workers, in particular,  
314 are at high risk due to limited sun exposure and poor nutritional status (40).

315 Within urban participants, hospital staff had lower vitamin D levels and a higher prevalence of  
316 inadequacy compared to healthy volunteers. This finding is supported by multiple studies  
317 indicating a high prevalence of vitamin D inadequacy among health personnel (41-46). The  
318 positive correlation between vitamin D and age in the urban population may be explained by  
319 higher supplement use among older individuals (43, 47, 48). Vitamin D supplementation, as  
320 shown in various studies, significantly increases serum 25(OH)D levels (43, 49).

321 The higher vitamin D levels in coastal fishermen compared to urban dwellers underscore the  
322 importance of sunlight exposure. Similar studies, such as those by Lee et al. (2018) and Haddad  
323 and Chyu (1971), also reported higher vitamin D levels in individuals with significant sun

324 exposure. Despite this, around 70% of coastal fishermen in this study had low vitamin D levels  
325 according to the Endocrine Society's cut-off, raising questions about the validity of the use of  
326 current threshold values. Previous studies in heavily sun-exposed regions in India, report similar  
327 findings of low vitamin D levels despite abundant sun exposure (50, 51).

## 328 **Reference Interval and Cut-off Point**

329 The reference intervals for vitamin D established in this study using healthy coastal fishermen  
330 population may represent the optimal levels for the Bangladeshi population. The reasoning  
331 behind this conclusion lies in both the nature of the studied group and the limitations of previous  
332 definitions of "optimal" vitamin D status.

333 Historically, earlier studies that defined vitamin D thresholds were methodologically flawed.  
334 Those studies failed to adequately consider factors such as sun exposure, health, and geographic  
335 variation (52-54). The use of populations with insufficient sun exposure led to a skewed  
336 understanding of vitamin D requirements. For example, previous normative ranges (10-55  
337 ng/mL) did not accurately capture true vitamin D deficiency, especially in groups with limited  
338 sun exposure. In contrast, populations like coastal fishermen, who have high exposure to  
339 sunlight, provide a more accurate picture of what might be the "natural" or optimal vitamin D  
340 levels for people living in sun-rich environments like Bangladesh.

341 In this study, a reference interval of 15.88 ng/mL (90% CI: 14.26–16.92) to 45.27 ng/mL (90%  
342 CI: 41.11–51.85) was determined using non-parametric methods aligning with the Clinical and  
343 Laboratory Standards Institute (CLSI) Guidelines(55). The non-parametric approach is  
344 appropriate given the asymmetry of the data, providing a robust understanding of the distribution

345 in the fishermen population. The upper limit of 45.27 ng/mL aligns with the commonly accepted  
346 upper limit proposed by the Endocrine Society, suggesting the upper threshold of vitamin D  
347 status is consistent across various populations.

348 However, the lower limit of 15.88 ng/mL stands below the traditionally accepted threshold levels  
349 (often cited as 20-30 ng/mL). This finding is supported by evidence from other population where  
350 lower cut-off values for vitamin D sufficiency have been proposed. For instance, studies from  
351 South Korea (56), India (30), China (28), and Greece (29) have consistently shown lower  
352 thresholds of 13-20 ng/mL. The range in this study is closer to those findings, implying that  
353 vitamin D requirements are likely influenced by both environmental and genetic factors, and that  
354 a universal cut-off point may not be applicable globally.

355 Moreover, PTH dynamics provide additional support for these lower thresholds. Vitamin D  
356 inadequacy is often marked by increased PTH levels, which serve as a surrogate marker for  
357 deficiency. However, in this study, no significant correlation between vitamin D and PTH levels  
358 was found in the coastal fishermen, unlike in the urban population, where a deflection point in  
359 PTH occurred at levels far below the Endocrine Society's recommended 30 ng/mL. Studies  
360 involving other population have noted similar findings: PTH rises as vitamin D level drops  
361 below 8-21.1 ng/mL (26, 28-30, 32, 57-60). These studies suggest that a threshold for PTH  
362 deflection, and thus vitamin D sufficiency, may indeed be lower than previously thought. The  
363 absence of PTH deflection in coastal fishermen may indicate the overall vitamin D adequacy of  
364 this population.

365 Additional support in favour of our low reference interval and lower cut-off values for vitamin D  
366 sufficiency comes from recent randomized controlled trials (RCTs) and cohort studies. For  
367 instance, post hoc analyses from trials like VITAL and ViDA revealed that vitamin D  
368 supplementation benefited participants only when baseline levels were below 12-15 ng/mL (61-  
369 63). Martineau et al. (2017) noted that vitamin D supplementation was most effective in  
370 preventing respiratory infections in participants with baseline levels below 10 ng/mL (64). These  
371 findings argue against higher supplementation thresholds and support a more moderate cut-off  
372 for deficiency. Furthermore, based on epidemiological evidence, Manson et al. (2016) and the  
373 Institute of Medicine (IOM), supports a deficiency threshold closer to 12.5 ng/mL(63, 65).  
374 Studies in pregnancy and diabetes prevention also point toward 15 ng/mL as a sufficient level for  
375 avoiding adverse outcomes (31, 66).

376 Based on this evidence, it is logical to conclude that the reference interval identified in the  
377 current study (15.88–45.27 ng/mL) could reflect the optimal range for the Bangladeshi  
378 population. The high sun exposure in coastal fishermen makes this population an ideal reference  
379 group, better reflecting the biological requirements of individuals in sun-rich environments like  
380 Bangladesh. Moreover, the lower limit of this range is consistent with thresholds suggested by  
381 contemporary studies that challenge higher vitamin D cut-off points. Thus, considering the  
382 surrogate evidence, PTH dynamics, and recent trial data, this study provides a more region-  
383 specific, evidence-backed approach in determining optimal vitamin D levels.

## 384 **Strengths and Limitations of this Study**

- 385 • The study employed a cross-sectional design, sampling both coastal fishermen and urban  
386 residents to establish the reference interval of vitamin D and determine the lower cutoff  
387 value.
- 388 • Reference intervals were established following the Clinical and Laboratory Standards  
389 Institute (CLSI) Guidelines C28-A3 for precise comparison across populations, and the  
390 lower cutoff value was identified using the PTH deflection point.
- 391 • Data collection included structured questionnaires, anthropometric measurements, and  
392 standardized biochemical testing to ensure accuracy and reliability.
- 393 • The study did not employ strict random sampling, which may introduce selection bias  
394 and limit generalizability.
- 395 • The absence of a gold-standard LC-MS/MS vitamin D assay may affect the precision of  
396 biochemical measurements.

## 397 **Conclusion and Recommendations**

398 Vitamin D, an essential micronutrient, is endogenously produced when exposed to sunlight.  
399 Despite the global prevalence of vitamin D deficiency/insufficiency, landmark trials have not  
400 justified routine vitamin D supplementation for the general population. The optimal vitamin D  
401 level remains controversial and may vary depending on population and geography. Bangladesh,  
402 with its ample sunlight, still faces widespread vitamin D inadequacy according to current  
403 reference values. This study's findings on healthy coastal fishermen provide critical insights into  
404 the optimal serum vitamin D levels for Bangladeshis. Additionally, the study has defined the

405 lower normal limit of vitamin D sufficiency by determining the serum iPTH deflection point,  
406 suggesting a lower optimal range than currently used.

407 Thus, the findings of the present study would help in guiding clinicians and policymakers in  
408 developing appropriate treatment and supplementation guidelines for Bangladeshi population.

## 409 **Data Availability Statement**

410 The dataset supporting the conclusions of this study is available in the Zenodo repository, DOI:  
411 [10.5281/zenodo.13950605](https://doi.org/10.5281/zenodo.13950605). Additional materials, such as the technical appendix and statistical code,  
412 can also be accessed at this DOI.

## 413 **Funding Statement**

414 The research received funding from the Bangladesh Medical Research Council (BMRC).

## 415 **Conflict of Interest**

416 The authors declare that they have no conflict of interest.

## 417 **Author Contributions**

418 Professor **Wasim Md Mohosin Ul Haque** made substantial contributions as the primary  
419 researcher, leading the data collection, analysis, and drafting of the manuscript. Professors  
420 **Jalaluddin Ashraful Haq, Md. Faruque Pathan, and Mohammed Abu Sayeed** contributed  
421 equally to the conception, design, interpretation of the data, and critical revision of the

422 manuscript for important intellectual content. All authors provided final approval of the version  
423 to be published and agree to be accountable for all aspects of the work, ensuring that any  
424 questions related to the accuracy or integrity of any part are appropriately investigated and  
425 resolved.

## 426 **Corresponding author**

427 Professor Wasim Md Mohosin Ul Haque

428 E-mail ID: [wmmhaque@live.com](mailto:wmmhaque@live.com)

429 Mobile number: +8801915472750

## 430 **Co-authors:**

431 Professors Jalaluddin Ashraful Haq

432 Email: [jahaq54@yahoo.com](mailto:jahaq54@yahoo.com)

433 Professors Md. Faruque Pathan

434 Email: [pathan279@yahoo.com](mailto:pathan279@yahoo.com)

435 Professors Mohammed Abu Sayeed

436 Email: [sayeed1950@gmail.com](mailto:sayeed1950@gmail.com)

437

## 438 **References:**

- 439 1. Layana AG, Minnella AM, Garhöfer G, Aslam T, Holz FG, Leys A, et al.  
440 Vitamin D and Age-Related Macular Degeneration. *Nutrients*. 2017;9(10):1120.
- 441 2. Nair R, Maseeh A. Vitamin D: The "sunshine" vitamin. *Journal of*  
442 *pharmacology & pharmacotherapeutics*. 2012;3(2):118-26.
- 443 3. Rebelos E, Tentolouris N, Jude E. The Role of Vitamin D in Health and  
444 Disease: A Narrative Review on the Mechanisms Linking Vitamin D with Disease and the Effects of  
445 Supplementation. *Drugs*. 2023;83(8):665-85.
- 446 4. Yin K, Agrawal DK. Vitamin D and inflammatory diseases. *J Inflamm*  
447 *Res*. 2014;7:69-87.
- 448 5. Ahmed S, Goldberg GR, Raqib R, Roy SK, Haque S, Braithwaite VS, et  
449 al. Aetiology of nutritional rickets in rural Bangladeshi children. *Bone*. 2020;136:115357.
- 450 6. Islam MZ, Bhuiyan N, Akhtaruzzaman M, Lamberg-Allardt C,  
451 Fogelholm M. Vitamin D deficiency in Bangladesh: A review of prevalence, causes and recommendations  
452 for mitigation. *Asia Pacific journal of clinical nutrition*. 2022;31:167-80.
- 453 7. Haque WMMU, Pathan MF, Sayeed M. Vitamin D status of healthy  
454 coastal fishermen of Bangladesh. *IMC Journal of Medical Science*. 2019;13(2):35-9.
- 455 8. Acherjya GK, Ali M, Tarafder K, Akhter N, Chowdhury MK, Islam DU, et  
456 al. Study of vitamin D deficiency among the apparently healthy population in Jashore, Bangladesh.  
457 *Mymensingh medical journal*. 2019;28(1):214-21.
- 458 9. Holick MF, Binkley NC, Bischoff-Ferrari HA, Gordon CM, Hanley DA,  
459 Heaney RP, et al. Evaluation, Treatment, and Prevention of Vitamin D Deficiency: an Endocrine Society  
460 Clinical Practice Guideline. *The Journal of Clinical Endocrinology & Metabolism*. 2011;96(7):1911-30.
- 461 10. Chopra B, Singh S, Singh K. Is there A Need to Reasses Reference  
462 Levels of Vitamin D for India ?-A Preliminary Survey of Vitamin D Levels in the Normal Population of  
463 Punjab. *International Journal of Science and Research*. 2015;4(1):1246-8.
- 464 11. Cauley JA, Lui LY, Ensrud KE, Zmuda JM, Stone KL, Hochberg MC, et al.  
465 Bone mineral density and the risk of incident nonspinal fractures in black and white women. *Jama*.  
466 2005;293(17):2102-8.
- 467 12. Bell NH, Greene A, Epstein S, Oexmann MJ, Shaw S, Shary J. Evidence  
468 for alteration of the vitamin D-endocrine system in blacks. *The Journal of Clinical Investigation*.  
469 1985;76(2):470-3.



- 470 13. Harinarayan CV, Holick MF, Prasad UV, Vani PS, Himabindu G. Vitamin  
471 D status and sun exposure in India. *Dermato-endocrinology*. 2013;5(1):130-41.
- 472 14. Hutchinson K, Healy M, Crowley V, Louw M, Rochev Y. Verification of  
473 Abbott 25-OH-vitamin D assay on the Architect system. *Pract Lab Med*. 2017;7:27-35.
- 474 15. CLSI CJD, establishing,, laboratory vriitc. Defining, establishing, and  
475 verifying reference intervals in the clinical laboratory; approved guideline. 2008.
- 476 16. Cherrie MP, Wheeler BW, White MP, Sarran CE, Osborne NJ. Coastal  
477 climate is associated with elevated solar irradiance and higher 25(OH)D level. *Environment*  
478 *international*. 2015;77:76-84.
- 479 17. Souberbielle J-C, Massart C, Brailly-Tabard S, Cavalier E, Chanson PJE.  
480 Prevalence and determinants of vitamin D deficiency in healthy French adults: the VARIETE study.  
481 2016;53(2):543-50.
- 482 18. Forrest KY, Stuhldreher WL. Prevalence and correlates of vitamin D  
483 deficiency in US adults. *Nutrition research (New York, NY)*. 2011;31(1):48-54.
- 484 19. Compher CW, Badellino KO, Boullata JI. Vitamin D and the bariatric  
485 surgical patient: a review. *Obesity surgery*. 2008;18(2):220-4.
- 486 20. Vanlint S. Vitamin D and obesity. *Nutrients*. 2013;5(3):949-56.
- 487 21. LAGUNOVA Z, POROJNICU AC, LINDBERG F, HEXEBERG S, MOAN J. The  
488 Dependency of Vitamin D Status on Body Mass Index, Gender, Age and Season. 2009;29(9):3713-20.
- 489 22. Selvarajan S, Gunaseelan V, Anandabaskar N, Xavier AS,  
490 Srinivasamurthy S, Kamalanathan SK, et al. Systematic review on vitamin D level in apparently healthy  
491 Indian population and analysis of its associated factors. *Indian journal of endocrinology and metabolism*.  
492 2017;21(5):765-75.
- 493 23. Bhatt SP, Misra A, Sharma M, Guleria R, Pandey RM, Luthra K, et al.  
494 Vitamin D insufficiency is associated with abdominal obesity in urban Asian Indians without diabetes in  
495 North India. *Diabetes technology & therapeutics*. 2014;16(6):392-7.
- 496 24. Leary PF, Zamfirova I, Au J, McCracken WH. Effect of latitude on  
497 vitamin D levels. *The Journal of the American Osteopathic Association*. 2017;117(7):433-9.
- 498 25. Gallagher JC. Vitamin D and aging. *Endocrinol Metab Clin North Am*.  
499 2013;42(2):319-32.
- 500 26. Choi SW, Kweon SS, Choi JS, Rhee JA, Lee YH, Nam HS, et al.  
501 Estimation of the cutoff value of vitamin D: the Dong-gu study. *J Physiol Anthropol*. 2015;34:10.

- 502 27. Holick MF. Vitamin D deficiency. *The New England journal of*  
503 *medicine*. 2007;357(3):266-81.
- 504 28. Hu Y, Li S, Liu Z, Yang X, Yang L. [Exploring study on the cutoff of  
505 vitamin D deficiency in Chinese adults]. *Wei Sheng Yan Jiu*. 2020;49(5):699-704.
- 506 29. Katrinaki M, Kampa M, Margioris A, Castanas E, Malliaraki N. Vitamin  
507 D levels in a large Mediterranean cohort: reconsidering normal cut-off values. *Hormones (Athens)*.  
508 2016;15(2):205-23.
- 509 30. Mukhopadhyay P, Ghosh S, Bhattacharjee K, Chowdhury S. Inverse  
510 Relationship Between 25 Hydroxy Vitamin D and Parathormone: Are there Two Inflection Points? *Indian*  
511 *J Endocrinol Metab*. 2019;23(4):422-7.
- 512 31. Rostami M, Simbar M, Amiri M, Bidhendi-Yarandi R, Hosseinpanah F,  
513 Ramezani Tehrani F. The optimal cut-off point of vitamin D for pregnancy outcomes using a generalized  
514 additive model. *Clin Nutr*. 2021;40(4):2145-53.
- 515 32. Shah S, Chiang C, Sikaris K, Lu Z, Bui M, Zebaze R, et al. Serum 25-  
516 Hydroxyvitamin D Insufficiency in Search of a Bone Disease. *The Journal of Clinical Endocrinology &*  
517 *Metabolism*. 2017;102(7):2321-8.
- 518 33. Islam MZ, Shamim AA, Kemi V, Nevanlinna A, Akhtaruzzaman M,  
519 Laaksonen M, et al. Vitamin D deficiency and low bone status in adult female garment factory workers in  
520 Bangladesh. *Br J Nutr*. 2008;99(6):1322-9.
- 521 34. Mahmood S, Rahman M, Biswas SK, Saqueeb SN, Zaman S,  
522 Manirujjaman M, et al. Vitamin D and Parathyroid Hormone Status in Female Garment Workers: A Case-  
523 Control Study in Bangladesh. *Biomed Res Int*. 2017;2017:4105375.
- 524 35. Ahmed AS, Haque WMMU, Uddin KN, Abrar FA, Afroz F, Huque HF, et  
525 al. Vitamin D and bone mineral density status among postmenopausal Bangladeshi women. *IMC Journal*  
526 *of Medical Science*. 2018;12(2):44-9.
- 527 36. Hossain HT, Islam QT, Khandaker MAK, Ahasan HN. Study of serum  
528 vitamin D level in different socio-demographic population-A pilot study. *Journal of Medicine*.  
529 2018;19(1):22-9.
- 530 37. Shefin SM, Qureshi NK, Nessa A, Latif ZA. Vitamin D status among  
531 Bangladeshi adult Muslim females having Diabetes and using hijab. *BIRDEM Medical Journal*.  
532 2018;8(3):203-9.
- 533 38. Khan AU, Hossain MA, Rahman MA, Rahman HW, Reza MA, Khan MK,  
534 et al. Estimation of vitamin D levels among physicians working in a tertiary Level hospital of Bangladesh.  
535 *Mymensingh medical journal*. 2019;28(2):322-7.

- 536 39. Siddiquee MH, Bhattacharjee B, Siddiqi UR, MeshbahurRahman M. High  
537 prevalence of vitamin D deficiency among the South Asian adults: a systematic review and meta-  
538 analysis. *BMC Public Health*. 2021;21(1):1823.
- 539 40. Akter S, Zubair M, Haque M. Assessment of nutritional status and food  
540 intake pattern of the selected adolescent industrial female workers in Bangladesh. *Journal of Science*  
541 *and Technology*. 2017;7(1):171-7.
- 542 41. Bishnoi S, Gombar S, Ahuja V, Bhardwaj N, Kaur J. Vitamin D levels of  
543 anesthesiologists working in tertiary care hospital of South Asian country: An observational study.  
544 *Journal of Anaesthesiology Clinical Pharmacology*. 2021;37(2):237-42.
- 545 42. Dogruel F, Gonen ZB, Canpolat DG, Ocak H, Bayram F. Investigation of  
546 Vitamin D levels in medical staff in a dental clinic. *Niger J Clin Pract*. 2019;22(4):573-7.
- 547 43. Farooka MW, Aslam SS, Tarar MA, Rafi M, Ahmad A, Rafique N, et al.  
548 Vitamin D perspective in front line healthcare workers amid COVID-19. *European Journal of Medical and*  
549 *Health Sciences*. 2021;3(4):65-72.
- 550 44. MATINI E, SHAYEGHI F, LAZEMI V, MOJRI N, ESMAEILI H, BAGHER A, et  
551 al. Vitamin D Deficiency Among Operating Room Staffs. *International Journal of Pharmaceutical*  
552 *Research*. 2021;13(1).
- 553 45. SHAKIBA M, RAFIEI P. PREVALENCE OF VITAMIN D DEFICIENCY  
554 AMONG MEDICAL STAFF IN SHAHID SADOUGHI HOSPITAL IN YAZD, IRAN. *TOLOO-E-BEHDASHT*.  
555 2009;7(3-4 (25)):-.
- 556 46. Sowah D, Fan X, Dennett L, Hagtvedt R, Straube S. Vitamin D levels  
557 and deficiency with different occupations: a systematic review. *BMC Public Health*. 2017;17(1):519.
- 558 47. Nasri H, Ardalan MR. Association of serum vitamin D level with age in  
559 individuals with normal renal function. *J Nephroarmacol*. 2012;1(1):7-9.
- 560 48. Khazaei Z, Khazaei S, Beigrezaei S, Nasri H. Vitamin D deficiency in  
561 healthy people and its relationship with gender and age. *J parathyr dis*. 2018;6(1):16-8.
- 562 49. Whiting SJ, Bonjour JP, Payen FD, Rousseau B. Moderate amounts of  
563 vitamin D3 in supplements are effective in raising serum 25-hydroxyvitamin D from low baseline levels in  
564 adults: a systematic review. *Nutrients*. 2015;7(4):2311-23.
- 565 50. Rattan R, Sahoo D, Mahapatra S. Prevalence of vitamin D deficiency in  
566 adults in the coastal regions of Odisha , India. *IOSR Journal of Pharmacy and Biological Science*.  
567 2016;Volume 11(Issue 6):49-52.
- 568 51. Harinarayan C, Ramalakshmi T, Prasad U, Sudhakar DJJoMR. Vitamin  
569 D status in Andhra Pradesh: a population based study. 2008;127(3):211.

- 570 52. Malabanan A, Veronikis IE, Holick MF. Redefining vitamin D  
571 insufficiency. *Lancet*. 1998;351(9105):805-6.
- 572 53. Holick MF. The Vitamin D Deficiency Pandemic: a Forgotten Hormone  
573 Important for Health. *Public Health Reviews*. 2010;32(1):267-83.
- 574 54. Haddad JG, Chyu KJ. Competitive protein-binding radioassay for 25-  
575 hydroxycholecalciferol. *The Journal of Clinical Endocrinology & Metabolism*. 1971;33(6):992-5.
- 576 55. Henny J, Vassault A, Boursier G, Vukasovic I, Mesko Brguljan P,  
577 Lohmander M, et al. Recommendation for the review of biological reference intervals in medical  
578 laboratories. *Clin Chem Lab Med*. 2016;54(12):1893-900.
- 579 56. Lee DH, Park KS, Cho MC. Laboratory confirmation of the effect of  
580 occupational sun exposure on serum 25-hydroxyvitamin D concentration. *Medicine*.  
581 2018;97(27):e11419.
- 582 57. Thomas MK, Lloyd-Jones DM, Thadhani RI, Shaw AC, Deraska DJ, Kitch  
583 BT, et al. Hypovitaminosis D in medical inpatients. *The New England journal of medicine*.  
584 1998;338(12):777-83.
- 585 58. Asghari G, Yuzbashian E, Wagner CL, Mahdavi M, Shamsi R,  
586 Hosseinpanah F, et al. The relation between circulating levels of vitamin D and parathyroid hormone in  
587 children and adolescents with overweight or obesity: Quest for a threshold. *PLOS ONE*.  
588 2019;14(11):e0225717.
- 589 59. Atapattu N, Shaw N, Hogler W. Relationship between serum 25-  
590 hydroxyvitamin D and parathyroid hormone in the search for a biochemical definition of vitamin D  
591 deficiency in children. *Pediatr Res*. 2013;74(5):552-6.
- 592 60. Metzger M, Houillier P, Gauci C, Haymann JP, Flamant M, Thervet E, et  
593 al. Relation between circulating levels of 25(OH) vitamin D and parathyroid hormone in chronic kidney  
594 disease: quest for a threshold. *The Journal of clinical endocrinology and metabolism*. 2013;98(7):2922-8.
- 595 61. LeBoff MS, Chou SH, Murata EM, Donlon CM, Cook NR, Mora S, et al.  
596 Effects of Supplemental Vitamin D on Bone Health Outcomes in Women and Men in the VITamin D and  
597 Omega-3 Trial (VITAL). *Journal of bone and mineral research : the official journal of the American*  
598 *Society for Bone and Mineral Research*. 2020.
- 599 62. Reid IR, Horne AM, Mihov B, Gamble GD, Al-Abuwsa F, Singh M, et al.  
600 Effect of monthly high-dose vitamin D on bone density in community-dwelling older adults substudy of a  
601 randomized controlled trial. *Journal of internal medicine*. 2017;282(5):452-60.
- 602 63. Manson J, Brannon PM, Rosen CJ, Taylor CLITNEjom. Vitamin D  
603 deficiency-is there really a pandemic? 2016;375(19):1817.

604 64. Martineau AR, Jolliffe DA, Hooper RL, Greenberg L, Aloia JF, Bergman  
605 P, et al. Vitamin D supplementation to prevent acute respiratory tract infections: systematic review and  
606 meta-analysis of individual participant data. *BMJ (Clinical research ed)*. 2017;356:i6583.

607 65. Institute of Medicine Committee to Review Dietary Reference Intakes  
608 for Vitamin D, Calcium. The National Academies Collection: Reports funded by National Institutes of  
609 Health. In: Ross AC, Taylor CL, Yaktine AL, Del Valle HB, editors. *Dietary Reference Intakes for Calcium  
610 and Vitamin D*. The National Academies Collection: Reports funded by National Institutes of Health.  
611 Washington (DC): National Academies Press (US)

612 Copyright © 2011, National Academy of Sciences.; 2011.

613 66. Pittas AG, Dawson-Hughes B, Sheehan P, Ware JH, Knowler WC, Aroda  
614 VR, et al. Vitamin D Supplementation and Prevention of Type 2 Diabetes. *N Engl J Med*. 2019;381(6):520-  
615 30.

616

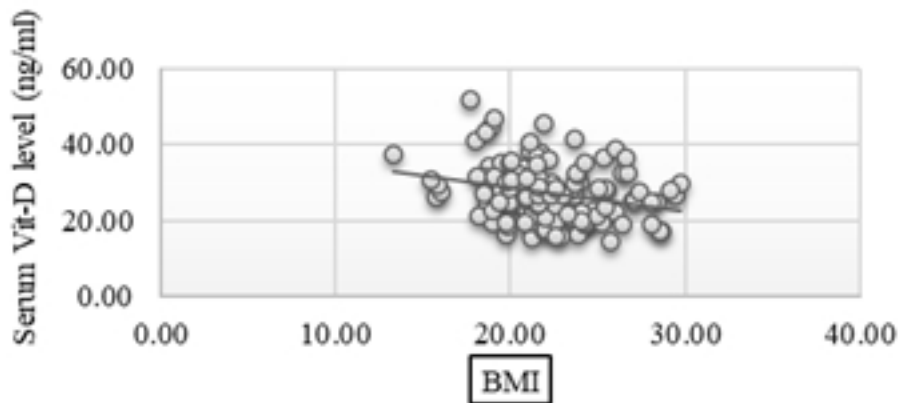

Figure 1

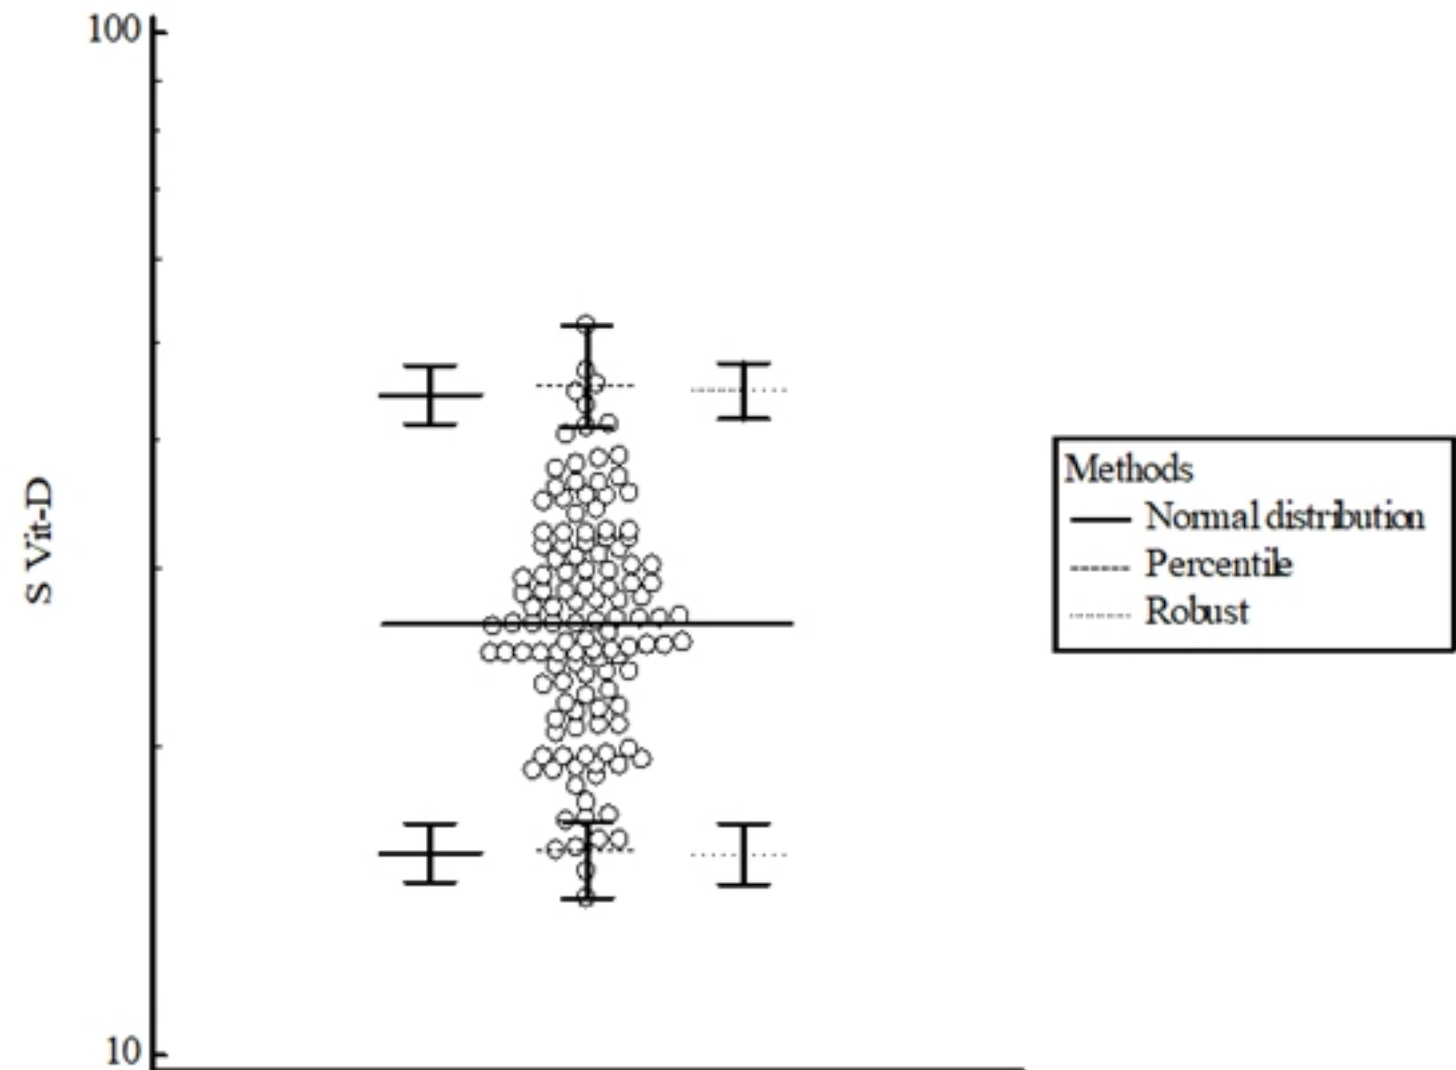

Figure 2

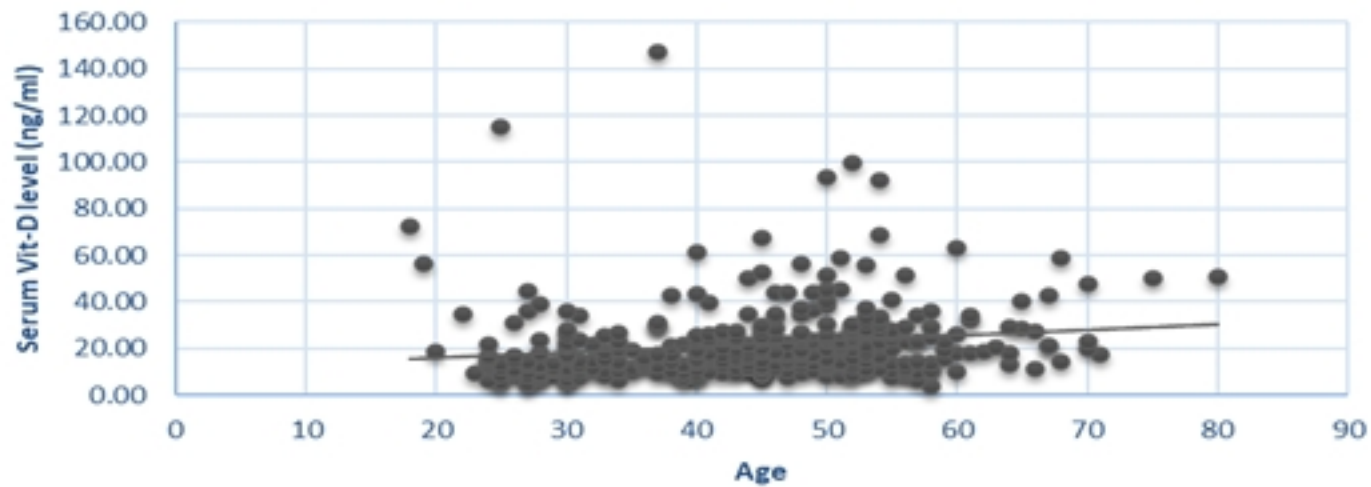

Figure 3



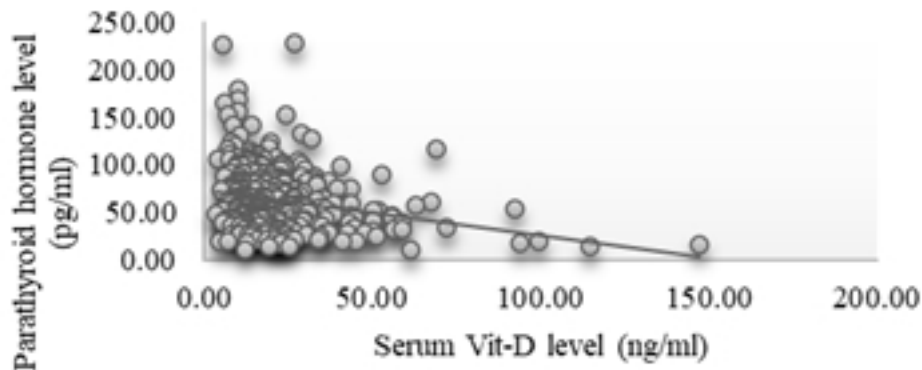

Figure 4

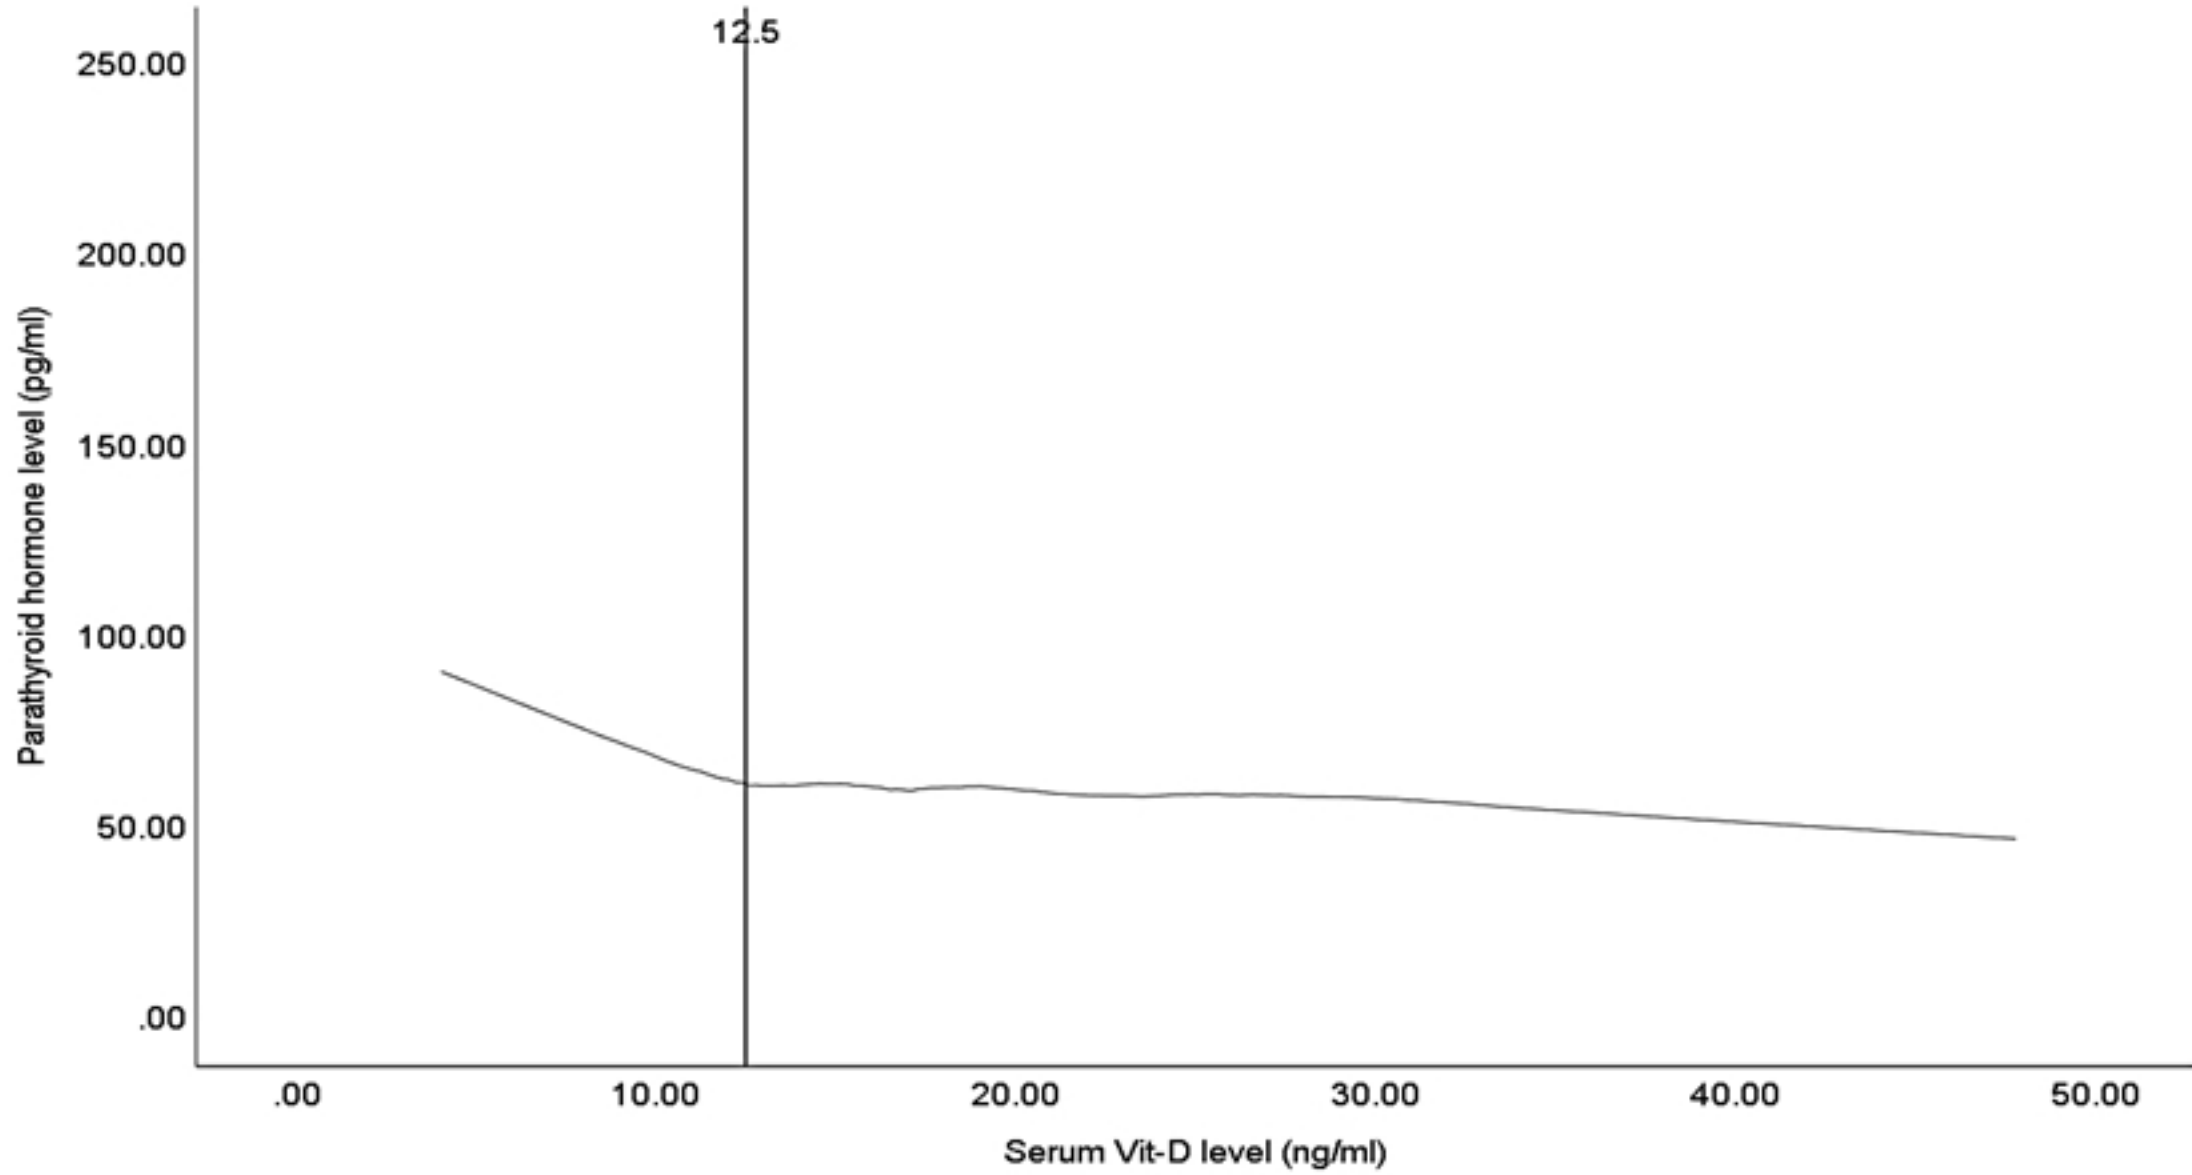

Figure 5
